# Supplementary material for: Metabolomics profiling reveals the mechanism of caffeic acid in extending lifespan in Drosophila melanogaster
Source: Royal Society of Chemistry journal article supplement (doi:10.1039/d0fo01332c), 2020-01-01
Supplement: d0fo01332c1.pdf [file d0fo01332c1.pdf]

**Metabolomics Profiling Reveals the Mechanism of Caffeic Acid in Extending Lifespan in  
*Drosophila melanogaster***

Jia-qi Li<sup>1</sup>, Jian-song Fang<sup>2\*</sup>, Xue-mei Qin<sup>1\*</sup>, Li Gao<sup>1\*</sup>

1. Modern Research Center for Traditional Chinese Medicine, Shanxi University, Taiyuan, 030006,  
PR China

2. Science and Technology Innovation Center, Guangzhou University of Chinese Medicine,  
Guangzhou 510405, PR China

\* Corresponding authors

E-mail: [gaoli87@sxu.edu.cn](mailto:gaoli87@sxu.edu.cn) (L.G.), [qinxm@sxu.edu.cn](mailto:qinxm@sxu.edu.cn) (X.Q.) and [fangjs@gzucm.edu.cn](mailto:fangjs@gzucm.edu.cn) (J.F.)

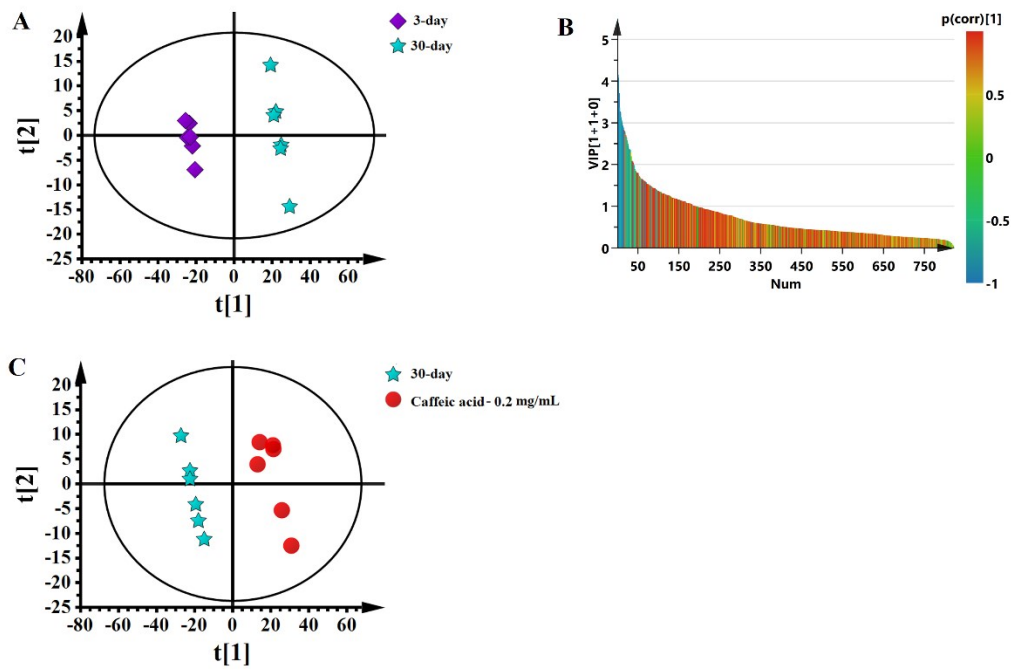

**Supplementary Figure 1.** (A) PLS-DA scores plot and (B) VIP-plot of 3-day group and 30-day group, (C) PLS-DA scores plot of 30-day group and 0.2 mg/mL caffeic acid supplementation group.

**Supplementary Table 1. Peak attribution in <sup>1</sup>H-NMR spectra for main metabolites in**

| NO | Metabolites     | Moieties                                                                                    | Chemical shifts                                   |
|----|-----------------|---------------------------------------------------------------------------------------------|---------------------------------------------------|
| 1  | lipid           | terminal-(CH <sub>2</sub> ) <sub>n</sub>                                                    | 0.89 (m), 1.25(m)                                 |
| 2  | isoleucine      | δCH <sub>3</sub> , δ'CH <sub>3</sub> , CH <sub>3</sub> , γCH <sub>3</sub>                   | 0.96 (t), 1.01(d)                                 |
| 3  | valine          | γCH <sub>3</sub> , γ'CH <sub>3</sub>                                                        | 0.99(d), 1.05(d)                                  |
| 4  | lactate         | αCH, βCH <sub>3</sub>                                                                       | 1.34(d), 4.12 (q)                                 |
| 5  | alanine         | β CH <sub>3</sub>                                                                           | 1.48 (d)                                          |
| 6  | lysine          | αCH, β CH <sub>2</sub> , δCH <sub>2</sub> , γCH <sub>2</sub> , ε-CH <sub>2</sub>            | 1.47(m), 1.72(m), 1.90(m),<br>3.03(t), 3.79(t)    |
| 7  | acetate         | CH <sub>3</sub>                                                                             | 1.92(s)                                           |
| 8  | glutamine       | αCH, βCH <sub>2</sub> , γCH <sub>2</sub>                                                    | 2.13(m), 2.45(m), 3.80(m)                         |
| 9  | glutamate       | γCH <sub>2</sub>                                                                            | 2.35(m)                                           |
| 10 | pyruvate        | CH <sub>3</sub>                                                                             | 2.36(s)                                           |
| 11 | succinate       | CH <sub>2</sub>                                                                             | 2.41(s)                                           |
| 12 | beta-alanine    | αCH <sub>2</sub> , βCH <sub>2</sub> ,                                                       | 2.56(t), 3.19(t)                                  |
| 13 | dimethylamine   | CH <sub>3</sub>                                                                             | 2.74(s)                                           |
| 14 | cysteine        | CH <sub>2</sub>                                                                             | 3.03(m)                                           |
| 15 | choline         | N(CH <sub>3</sub> ) <sub>3</sub>                                                            | 3.21(s)                                           |
| 16 | tmao            | CH <sub>3</sub>                                                                             | 3.23(s)                                           |
| 17 | cystine         | CH <sub>2</sub>                                                                             | 3.41(s)                                           |
| 18 | tryptophan      | CH, CH <sub>2</sub>                                                                         | 3.47(dd), 7.55(d)                                 |
| 19 | glycine         | CH <sub>2</sub>                                                                             | 3.50(s)                                           |
| 20 | glycerol        | βCH <sub>2</sub> , β'CH <sub>2</sub>                                                        | 3.56(dd), 3.64(dd)                                |
| 21 | beta-d-glucose  | βC <sub>1</sub> H                                                                           | 4.66(d)                                           |
| 22 | alpha-d-glucose | CH                                                                                          | 5.23(d)                                           |
| 23 | uracil          | C <sub>5</sub> H, C <sub>6</sub> H                                                          | 5.81 (d), 7.55(d)                                 |
| 24 | fumarate        | CH=CH                                                                                       | 6.53(s)                                           |
| 25 | tyrosine        | 3 or 5-CH, 2 or 6-CH                                                                        | 6.91(d), 7.20(d)                                  |
| 26 | histidine       | 5CH, 3CH                                                                                    | 7.09(s), 7.38(s)                                  |
| 27 | Phenylalanine   | 2CH, 4CH, 3CH                                                                               | 7.33 (m), 7.38 (m), 7.43 (m)                      |
| 28 | AMP             | C <sub>4</sub> H-ribose, C <sub>3</sub> H-ribose, C <sub>1</sub> H-ribose, CH-ring, CH-ring | 4.01 (m), 4.37 (m), 4.51 (m),<br>6.11(m), 8.24(s) |

**tissues of flies.**

TMAO, trimethylamine-N-oxide; AMP, adenosine monophosphate; s, singlet, d, doublet, dd, doublet of doublet, t, triplet, m, multiplet.

**Supplementary Table 2. Differential metabolites in the 30-day group and 0.2 mg/mL caffeic acid supplementation group.**

| <b>Metabolites</b> | <b>30-d group vs 3-d group</b> | <b>Fold change</b> | <b>Caffeic acid group vs 30-d group</b> | <b>Fold change</b> |
|--------------------|--------------------------------|--------------------|-----------------------------------------|--------------------|
| lipid              | down                           | 0.41               | up                                      | 0.47               |
| isoleucine         | down                           | 0.32               | up                                      | 0.48               |
| valine             | down                           | 0.32               | up                                      | 0.51               |
| alanine            | down                           | 0.32               | up                                      | 0.50               |
| lysine             | down                           | 0.30               | up                                      | 0.38               |
| acetate            | down                           | 0.36               | up                                      | 0.45               |
| glutamate          | down                           | 0.44               | up                                      | 0.51               |
| pyruvate           | down                           | 0.51               | up                                      | 0.80               |
| succinate          | down                           | 0.50               | up                                      | 0.62               |
| beta-alanine       | down                           | 0.32               | up                                      | 0.34               |
| cysteine           | down                           | 0.30               | up                                      | 0.38               |
| tryptophan         | down                           | 0.36               | up                                      | 0.38               |
| glycine            | up                             | 0.75               | down                                    | 0.31               |
| glycerol           | down                           | 0.41               | up                                      | 0.40               |
| beta-d-glucose     | up                             | 0.63               | down                                    | 0.21               |
| alpha-d-glucose    | up                             | 0.54               | down                                    | 0.24               |
| histidine          | down                           | 0.71               | up                                      | 2.22               |
